# Supplementary material for: Current status ofHelicobacter pyloriresistance to Clarithromycin and Levofloxacin in Malaysia—findings from a molecular based study
Source: PeerJ journal article supplement (doi:10.7717/peerj.11518), 2021-06-09
Supplement: Accession_No_Supplementary_Table_for_PeerJ.pdf [file Accession_No_Supplementary_Table_for_PeerJ.pdf]

|                 | No. | Sequence ID     | Accession No. | Sample ID |
|-----------------|-----|-----------------|---------------|-----------|
| 23S rRNA A2147G | 1   | SUB8683063 Seq1 | MW341345      | 3         |
|                 | 2   | SUB8683063 Seq2 | MW341346      | 28        |
|                 | 3   | SUB8683063 Seq3 | MW341347      | 70        |
|                 | 4   | SUB8683063 Seq4 | MW341348      | 109       |
|                 | 5   | SUB8683063 Seq5 | MW341349      | 124       |
|                 | 6   | SUB8683063 Seq6 | MW341350      | 41        |
|                 | 7   | SUB8683063 Seq7 | MW341351      | 60        |
|                 | 8   | SUB8683063 Seq8 | MW341352      | 82        |
|                 | 9   | SUB8683063 Seq9 | MW341353      | 118       |

|                 | No. | Sequence ID      | Accession No. | Sample ID |
|-----------------|-----|------------------|---------------|-----------|
| 23S rRNA T2186C | 1   | SUB8683402 Seq1  | MW341355      | 100       |
|                 | 2   | SUB8683402 Seq2  | MW341356      | 102       |
|                 | 3   | SUB8683402 Seq3  | MW341357      | 106       |
|                 | 4   | SUB8683402 Seq4  | MW341358      | 112       |
|                 | 5   | SUB8683402 Seq5  | MW341359      | 115       |
|                 | 6   | SUB8683402 Seq6  | MW341360      | 116       |
|                 | 7   | SUB8683402 Seq7  | MW341361      | 118       |
|                 | 8   | SUB8683402 Seq8  | MW341362      | 119       |
|                 | 9   | SUB8683402 Seq9  | MW341363      | 120       |
|                 | 10  | SUB8683402 Seq10 | MW341364      | 122       |
|                 | 11  | SUB8683402 Seq11 | MW341365      | 124       |
|                 | 12  | SUB8683402 Seq12 | MW341366      | 19        |
|                 | 13  | SUB8683402 Seq13 | MW341367      | 20        |
|                 | 14  | SUB8683402 Seq14 | MW341368      | 26        |
|                 | 15  | SUB8683402 Seq15 | MW341369      | 2         |
|                 | 16  | SUB8683402 Seq16 | MW341370      | 30        |
|                 | 17  | SUB8683402 Seq17 | MW341371      | 33        |
|                 | 18  | SUB8683402 Seq18 | MW341372      | 38        |
|                 | 19  | SUB8683402 Seq19 | MW341373      | 39        |
|                 | 20  | SUB8683402 Seq20 | MW341374      | 3         |
|                 | 21  | SUB8683402 Seq21 | MW341375      | 40        |
|                 | 22  | SUB8683402 Seq22 | MW341376      | 41        |
|                 | 23  | SUB8683402 Seq23 | MW341377      | 42        |
|                 | 24  | SUB8683402 Seq24 | MW341378      | 43        |
|                 | 25  | SUB8683402 Seq25 | MW341379      | 46        |
|                 | 26  | SUB8683402 Seq26 | MW341380      | 53        |
|                 | 27  | SUB8683402 Seq27 | MW341381      | 55        |
|                 | 28  | SUB8683402 Seq28 | MW341382      | 56        |
|                 | 29  | SUB8683402 Seq29 | MW341383      | 59        |
|                 | 30  | SUB8683402 Seq30 | MW341384      | 5         |
|                 | 31  | SUB8683402 Seq31 | MW341385      | 61        |
|                 | 32  | SUB8683402 Seq32 | MW341386      | 62        |

|    |                  |          |    |
|----|------------------|----------|----|
| 33 | SUB8683402 Seq33 | MW341387 | 64 |
| 34 | SUB8683402 Seq34 | MW341388 | 68 |
| 35 | SUB8683402 Seq35 | MW341389 | 70 |
| 36 | SUB8683402 Seq36 | MW341390 | 72 |
| 37 | SUB8683402 Seq37 | MW341391 | 75 |
| 38 | SUB8683402 Seq38 | MW341392 | 77 |
| 39 | SUB8683402 Seq39 | MW341393 | 7  |
| 40 | SUB8683402 Seq40 | MW341394 | 82 |
| 41 | SUB8683402 Seq41 | MW341395 | 88 |
| 42 | SUB8683402 Seq42 | MW341396 | 95 |
| 43 | SUB8683402 Seq43 | MW341397 | 96 |
| 44 | SUB8683402 Seq44 | MW341398 | 9  |

|            | No. | Sequence ID         | Accession No. | Sample ID |
|------------|-----|---------------------|---------------|-----------|
| gyrA 87Asn | 1   | BankIt2406531 Seq1  | MW375361      | 130       |
|            | 2   | BankIt2406964 Seq1  | MW375363      | 100       |
|            | 3   | BankIt2406964 Seq2  | MW375364      | 102       |
|            | 4   | BankIt2406964 Seq3  | MW375365      | 106       |
|            | 5   | BankIt2406964 Seq4  | MW375366      | 115       |
|            | 6   | BankIt2406964 Seq5  | MW375367      | 124       |
|            | 7   | BankIt2406964 Seq6  | MW375368      | 21        |
|            | 8   | BankIt2406964 Seq7  | MW375369      | 22        |
|            | 9   | BankIt2406964 Seq8  | MW375370      | 30        |
|            | 10  | BankIt2406964 Seq9  | MW375371      | 32        |
|            | 11  | BankIt2406964 Seq10 | MW375372      | 39        |
|            | 12  | BankIt2406964 Seq11 | MW375373      | 40        |
|            | 13  | BankIt2406964 Seq12 | MW375374      | 42        |
|            | 14  | BankIt2406964 Seq13 | MW375375      | 46        |
|            | 15  | BankIt2406964 Seq14 | MW375376      | 59        |
|            | 16  | BankIt2406964 Seq15 | MW375377      | 5         |
|            | 17  | BankIt2406964 Seq16 | MW375378      | 61        |
|            | 18  | BankIt2406964 Seq17 | MW375379      | 64        |
|            | 19  | BankIt2406964 Seq18 | MW375380      | 66        |
|            | 20  | BankIt2406964 Seq19 | MW375381      | 69        |
| gyrA D91N  | No. | Sequence ID         | Accession No. | Sample ID |
|            | 1   | BankIt2406532 Seq1  | MW375362      | 2         |
|            | 2   | BankIt2406971 Seq1  | MW375382      | 60        |

|             | No. | Sequence ID        | Accession No. | Sample ID |
|-------------|-----|--------------------|---------------|-----------|
| gyrB 438Phe | 1   | BankIt2406536 Seq1 | MW375406      | 21        |
|             | 2   | BankIt2406986 Seq1 | MW375407      | 103       |
|             | 3   | BankIt2406986 Seq2 | MW375408      | 105       |
|             | 4   | BankIt2406986 Seq3 | MW375409      | 109       |
|             | 5   | BankIt2406986 Seq4 | MW375410      | 32        |
|             | 6   | BankIt2406986 Seq5 | MW375411      | 61        |
|             | 7   | BankIt2406986 Seq6 | MW375412      | 80        |

|            | No. | Sequence ID        | Accession No. | Sample ID |
|------------|-----|--------------------|---------------|-----------|
| gyrB D481E | 1   | BankIt2406537 Seq1 | MW375383      | 5         |
|            | 2   | BankIt2406999 Seq1 | MW375385      | 102       |
|            | 3   | BankIt2406999 Seq2 | MW375386      | 19        |
|            | 4   | BankIt2406999 Seq3 | MW375387      | 22        |
|            | 5   | BankIt2406999 Seq4 | MW375388      | 26        |
|            | 6   | BankIt2406999 Seq5 | MW375389      | 30        |
|            | 7   | BankIt2406999 Seq6 | MW375390      | 55        |
|            | 8   | BankIt2406999 Seq7 | MW375391      | 61        |
|            | 9   | BankIt2406999 Seq8 | MW375392      | 75        |
|            | 10  | BankIt2406999 Seq9 | MW375393      | 95        |

|            | No. | Sequence ID         | Accession No. | Sample ID |
|------------|-----|---------------------|---------------|-----------|
| gyrB R484K | 1   | BankIt2406539 Seq1  | MW375384      | 5         |
|            | 2   | BankIt2407008 Seq1  | MW375394      | 102       |
|            | 3   | BankIt2407008 Seq2  | MW375395      | 116       |
|            | 4   | BankIt2407008 Seq3  | MW375396      | 19        |
|            | 5   | BankIt2407008 Seq4  | MW375397      | 22        |
|            | 6   | BankIt2407008 Seq5  | MW375398      | 26        |
|            | 7   | BankIt2407008 Seq6  | MW375399      | 30        |
|            | 8   | BankIt2407008 Seq7  | MW375400      | 55        |
|            | 9   | BankIt2407008 Seq8  | MW375401      | 61        |
|            | 10  | BankIt2407008 Seq9  | MW375402      | 68        |
|            | 11  | BankIt2407008 Seq10 | MW375403      | 69        |
|            | 12  | BankIt2407008 Seq11 | MW375404      | 75        |
|            | 13  | BankIt2407008 Seq12 | MW375405      | 95        |
